# Supplementary material
Source: HighWire-hosted journal article supplement (https://www.cmajopen.ca/highwire/filestream/84447/field_highwire_adjunct_files/1/2020-0081-original-submission.pdf)
Supplement: 2020-0081-original-submission.pdf [file 2020-0081-original-submission.pdf]

1  
2  
3 **Title:** Associations of perceived risk of regular cannabis use with cannabis-related driving and  
4 passenger behaviours among Canadian high school students: a cross-sectional study.  
5

6 **Authors' names:** Melissa Carpino MSc<sup>1</sup>, Donald Langille MD MHSc<sup>1</sup>, Gabriela Ilie PhD<sup>1,2</sup>,  
7 Mark Asbridge PhD<sup>1,3</sup>  
8  
9

10 <sup>1</sup>Department of Community Health and Epidemiology, Dalhousie University

11 <sup>2</sup>Department of Urology, Dalhousie University

12 <sup>3</sup>Department of Emergency Medicine, Dalhousie University  
13

14 **Correspondence to:** Melissa Carpino, melissa.carpino@dal.ca  
15  
16

17 **Funding statement:** No funding to declare.  
18

19 **Competing interests:** None declared.  
20  
21  
22  
23  
24  
25  
26  
27  
28  
29  
30  
31  
32  
33  
34  
35  
36  
37  
38  
39  
40  
41  
42  
43  
44  
45  
46  
47  
48  
49  
50  
51  
52  
53  
54  
55  
56  
57  
58  
59  
60

Confidential

## Abstract

**Background:** Rates of driving under the influence of cannabis (DUIC) among youth have now surpassed rates of drinking and driving across Canada. Many Canadian youth also report riding with a cannabis-impaired driver (RWCD), and many perceive cannabis as safe, with limited impairing effects. Youth's lack of awareness of the potential driving risks posed by cannabis may make them more likely to engage in cannabis-related driving behaviours. The present study examined associations of perceived risk associated with regular cannabis use with DUIC and RWCD.

**Methods:** Our study examined cross-sectional data from 33,915 high school students who took part in a national survey in 2016-2017. Multinomial logistic regression techniques were used to generate adjusted and unadjusted models for DUIC and RWCD.

**Results:** Greater perceived risk of regular cannabis use was associated with reduced risk of DUIC and RWCD in a dose-response manner. Students who perceived that regular cannabis use posed great risk had 0.06 (95% CI: 0.04, 0.10) times the risk of past 30-day DUIC compared to students who perceived that regular use posed no risk. Students who perceived that regular cannabis use posed great risk had 0.08 (95% CI: 0.07, 0.10) times the risk of past 30-day RWCD compared to students who perceived that regular use posed no risk. Associations were consistent for both sexes and for urban and rural students.

**Interpretation:** Given the importance of youth perceptions in shaping cannabis-related driving and passenger behaviours, efforts must be made to disseminate appropriate information regarding cannabis-related driving risks to high school students.

WORD COUNT: 250

## Introduction

Considering Canada's recent legalization of recreational cannabis, driving under the influence of cannabis (DUIC) is increasingly relevant to public health and safety. Evidence from legalization experiences in the United States<sup>1,2</sup> has raised concern that legalization may increase cannabis use and DUIC in Canada, particularly among youth.

After alcohol, cannabis is the most used psychoactive substance in Canada (used by 15% of Canadians in 2017 for medical and recreational purposes)<sup>3</sup>. An approximate two-fold increase in the risk of a motor vehicle collision with recent cannabis use has been demonstrated<sup>4,5</sup>, and risk of crash increases with increasing tetrahydrocannabinol (THC) levels<sup>5</sup>. However, recent case-control studies do not support increased crash risk with THC exposure after adjusting for appropriate variables<sup>6,7,8</sup>. Despite mixed findings, cannabis is the second most frequently detected drug in injured and fatally injured Canadian drivers<sup>9,10,11,12,13</sup>.

Over 2% of Canadian drivers report DUIC in the past 30 days<sup>14</sup>. In 2012, DUIC was most prevalent among Canadians aged 18-19 (8.3%), followed by those aged 15-17 (6.4%)<sup>15,16</sup>. Many Canadian youth also report riding with a cannabis-impaired driver (RWCD). National data indicates that 20% of high school students report ever RWCD<sup>17</sup>. While males and rural students are more likely to report DUIC compared to females and urban students, respectively<sup>17,18,19,20,21</sup>, there is little data related to cannabis-related passenger behaviour among students.

Many youth perceive that cannabis has limited effects on driving<sup>22,23</sup>. Psychological models theorize that demographic characteristics (e.g., age, sex, race, etc.), sociopsychological factors (e.g., autonomy), and structural variables (e.g., prior exposure to a condition) influence risk perception<sup>24,25,26</sup>. Youth perceptions of risks associated with cannabis use and DUIC may also be due to cognitive factors, including comparative optimism bias<sup>27</sup> – a cognition that leads individuals to estimate their own risk of a negative event as lower than that of others<sup>28</sup>. Few studies have explored the role of risk perception in shaping behaviours such as DUIC and RWCD among youth<sup>29,30,31</sup>.

Our primary objective was to examine associations of perceived risk of regular cannabis use with DUIC and RWCD among Canadian high school students. We aimed to determine: 1) whether these associations were dose-related, such that greater perceived risk was associated with reduced risk of DUIC and RWCD, and 2) whether these associations differed between males and females, and urban and rural students.

## Methods

### *Setting*

The Canadian Student Tobacco, Alcohol and Drugs Survey (CSTADS) was administered between October 2016 and June 2017 in private, public, and Catholic schools attended by students in grades 7-12 (secondary I-V in Québec) across nine Canadian provinces. Schools in New Brunswick (which declined participation) and the three territories were excluded.

### *Participants*

The present study includes 33,915 high school students in grades 9-12 who took part in the 2016-2017 survey cycle. In total, 117 school boards, 699 schools, and 52,103 students in grades 7-12 participated. Both active and passive permission protocols were used to obtain parental permission for participation. Overall, the response rate was 76%.

As Canadian adolescents can operate motor vehicles between ages 16 and 17, the sample included only students in grades 11 and 12 (14,520 students) for analyses of DUIC. Analyses of RWCD were based on all 33,915 students in grades 9-12.

### *Study Design*

The survey used a stratified single-stage cluster design. Strata were based on two classifications: health region cigarette smoking rate and school type. To ensure a generalizable sample within each province, schools were selected from strata at random, and then all eligible students within selected schools were surveyed. This sampling design was used in all provinces except Québec since the 2016-2017 CSTADS was conducted in partnership with the Québec Health Survey of High School Students. Detailed information on the sampling strategy used in Québec can be found in the CSTADS' publicly available microdata file. A cross-sectional study design was used to address the research questions.

### *Outcome Variables*

DUIC was derived from responses to the question: "Have you driven a vehicle (e.g., car, snowmobile, motor boat, or all-terrain vehicle (ATV)) within 2 hours of using marijuana or cannabis?". Response options were: "No, never", "Yes, in the last 30 days", and "Yes, more than 30 days ago". DUIC was coded 0 for "No, never"; 1 for "Yes, in the last 30 days"; and 2 for

1  
2  
3 "Yes, more than 30 days ago". RWCD was derived from responses to the question: "Have you  
4 ever been a passenger in a vehicle (e.g., car, snowmobile, motor boat, or ATV) driven by  
5 someone who had been using marijuana or cannabis in the last 2 hours?". Response options  
6 were: "No, never", "Yes, in the last 30 days", "Yes, more than 30 days ago", and "I do not  
7 know". To avoid having more than three categories for this outcome, RWCD was coded 0 for  
8 "No, never" and "I do not know"; 1 for "Yes, in the last 30 days"; and 2 for "Yes, more than 30  
9 days ago".  
10  
11  
12  
13  
14  
15  
16

### 17 *Independent Variable*

18 Perceived risk of regular cannabis use was assessed by asking: "How much do you think  
19 people risk harming themselves when they smoke marijuana or cannabis on a regular basis?".  
20 Response options were: "No risk", "Slight risk", "Moderate risk", "Great risk", and "I do not  
21 know". Using "No risk" as the reference category, the variable was coded 0 for "No risk"; 1 for  
22 "Slight risk"; 2 for "Moderate risk"; 3 for "Great risk"; and 4 for "I do not know" and/or not  
23 stated.  
24  
25  
26  
27  
28  
29  
30

### 31 *Covariates*

32 Analyses controlled for sociodemographic variables including sex (male or female),  
33 school grade, rurality, province of residence, and autonomy. School grade was used as a proxy  
34 for age (Health Canada did not permit an age measurement). Rurality was derived by assessing  
35 whether the respondent's school was in an urban or rural location. Urban and rural categories  
36 were derived from school postal codes that were based on Statistics Canada's Statistical Area  
37 Classification system. Province of residence was coded 0 for Ontario (the reference), with  
38 numbers from 1-8 for remaining provinces. Autonomy, defined by the survey as "our need for  
39 personal freedom to make choices or decisions that affect our lives", was measured using six  
40 items to capture students' overall autonomy in the past week (e.g., "I feel free to express myself  
41 at home", "I feel free to express myself with my friends", etc.). The scale had high internal  
42 consistency (Cronbach's  $\alpha = 0.95$ ). Response options for the six items were: "Really false for  
43 me", "Sort of false for me", "Sort of true for me", and "Really true for me". An autonomy scale  
44 (scored 0-3, meaning least to most autonomy) was created for each of the six items, with a total  
45  
46  
47  
48  
49  
50  
51  
52  
53  
54  
55  
56  
57  
58  
59  
60

1  
2  
3 score ranging from 0-18 (lowest to highest autonomy). Autonomy score was divided into  
4 quartiles: "High" (the reference), "Moderate", "Low", and "Very low".  
5  
6  
7

### 8 *Statistical Analysis*

9

10 All prevalence estimates and statistical tests accounted for the stratified cluster sample  
11 design and were based on survey weights and bootstrap weights. Survey weights were used to  
12 adjust for school selection and non-response at the school, grade, and student level, and to derive  
13 meaningful population estimates from the survey sample. Bootstrap weights were used to  
14 account for the effects of the survey design (e.g., the clustered data) on variance estimates, and to  
15 more precisely estimate sampling error.  
16  
17  
18  
19

20 Multinomial logistic regression was used to examine associations between perceived risk  
21 of regular cannabis use and cannabis-related driving behaviours. To determine whether these  
22 associations differed between males and females and/or rural and urban students, multinomial  
23 logistic regression was also employed, now with two stages of testing. In the first stage, effect  
24 modification was tested using a sex by perceptions interaction term (and a rurality by perceptions  
25 term) to see if we should proceed with stratification (stage two) by sex and/or rurality. To test the  
26 robustness of the main findings, a sensitivity analysis for the DUIC model was performed; the  
27 association between perceived risk of regular cannabis use and DUIC was tested separately for  
28 grade 11 and 12 students who had used cannabis at least once in the past year. To handle missing  
29 data, listwise deletion was used to achieve a complete case analysis. This reduced the sample to  
30 14,147 students for analyses of DUIC, and to 33,116 students for analyses of RWCD. All  
31 multinomial logistic regression analyses were performed using Stata/IC 15.0. We used the  
32 Strengthening the Reporting of Observational Studies in Epidemiology (STROBE) cross-  
33 sectional checklist when writing our report<sup>32</sup>.  
34  
35  
36  
37  
38  
39  
40  
41  
42  
43  
44  
45

### 46 **Results**

47

48 Nearly 10% of senior students reported DUIC in the past year, and almost 20% of  
49 students in grades 9-12 reported RWCD (Table 1). Approximately half (46%) perceived great  
50 risk associated with regular cannabis use, with 10% perceiving no risk (Table 1).  
51  
52

53 Table 2 presents unadjusted and adjusted results of a multinomial logistic regression  
54 model of DUIC by perceived risk of regular cannabis use among grade 11 and 12 students  
55  
56  
57  
58  
59  
60

1  
2  
3 including results for covariates. Adjusted results revealed a dose-response pattern, with greater  
4 perceived risk of regular cannabis use significantly associated with reduced risk of DUIC in the  
5 last 30 days and more than 30 days ago. Students perceiving that regular cannabis use posed  
6 great risk had 0.06 (95% confidence interval (CI): 0.04, 0.10) times the risk of past 30-day DUIC  
7 and 0.11 (95% CI: 0.08, 0.15) times the risk of DUIC more than 30 days ago, compared to  
8 students perceiving that regular use posed no risk. Adjusted estimates also indicated that male  
9 students and grade 12 students had a significantly increased risk of DUIC in the last 30 days and  
10 more than 30 days ago, compared to females and students in grade 11, respectively. Rural  
11 students had a significantly increased risk of past 30-day DUIC compared with urban students,  
12 but not for more than 30 days ago. Students in four provinces had a significantly increased risk  
13 of past 30-day DUIC compared to Ontario students. Similarly, compared to Ontario, the risk of  
14 DUIC more than 30 days ago was significantly increased among students in almost all provinces.  
15 Adjusted results found that students with very low autonomy scores had a significantly increased  
16 risk of DUIC more than 30 days ago. A sensitivity analysis revealed the same trend as the main  
17 analysis; however, the effect sizes were less robust. Unadjusted results from Table 2 were  
18 generally consistent with adjusted results.  
19  
20  
21  
22  
23  
24  
25  
26  
27  
28  
29  
30

31 Table 3 presents unadjusted and adjusted results of a multinomial logistic regression  
32 model of RWCD by perceived risk of regular cannabis use among students in grades 9-12 along  
33 with results for covariates. Adjusted estimates indicated a dose-response pattern, whereby greater  
34 perceived risk of regular cannabis use was significantly associated with reduced risk of RWCD  
35 in the last 30 days and more than 30 days ago. Students perceiving that regular cannabis use  
36 posed great risk had 0.08 (95% CI: 0.07, 0.10) times the risk of past 30-day RWCD and 0.23  
37 (95% CI: 0.19, 0.28) times the risk of RWCD more than 30 days ago, compared to students  
38 perceiving that regular cannabis use posed no risk. Adjusted estimates also indicated a dose-  
39 dependent effect of school grade on risk of RWCD, whereby risk of RWCD (in the last 30 days  
40 and more than 30 days ago) increased significantly with school grade level. While male students  
41 had a significantly reduced risk of RWCD in the last 30 days and more than 30 days ago  
42 compared to females, adjusted results revealed that relative to urban students, students from rural  
43 schools had a significantly increased risk of RWCD in the last 30 days and more than 30 days  
44 ago. Compared to students in Ontario, students from most provinces had a significantly increased  
45 risk of RWCD in the last 30 days and more than 30 days ago. Finally, the risk of RWCD more  
46  
47  
48  
49  
50  
51  
52  
53  
54  
55  
56  
57  
58  
59  
60

1  
2  
3 than 30 days ago increased significantly as students' self-reported level of autonomy decreased.  
4 Unadjusted results from Table 3 were consistent with adjusted results.

5  
6 Interaction models for DUIC and RWCD by sex and by rurality were tested but were not  
7 significant.  
8  
9

## 10 11 12 **Interpretation**

13 The major findings presented here are as follows. First, adjusted analyses found that  
14 greater perceived risk of regular cannabis use was associated with reduced risk of DUIC and  
15 RWCD in a dose-response manner. These findings replicate results from recent empirical studies  
16 in the United States that explored cognitive risk factors for driving after cannabis use among  
17 youth<sup>30,31</sup>. Second, no evidence of effect modification by sex or rurality for either the association  
18 between risk perception and DUIC, or RWCD was observed; associations of risk perception of  
19 regular cannabis use with DUIC and RWCD were significantly protective for both males and  
20 females, and for urban and rural students. To our knowledge, this is the first Canadian study to  
21 consider whether associations of perceived risk of regular cannabis use with DUIC and RWCD  
22 varied between males and females, and urban and rural students.  
23  
24  
25  
26  
27  
28  
29  
30

31 Heightening the risk perceptions of students who feel that regular cannabis use poses no  
32 risk at all may be an effective strategy for reducing both behaviours. This assumes that  
33 increasing people's perceptions of risk (or their perceived threat) will engender behaviour  
34 change. This assumption is central to various health psychology models including the Health  
35 Belief Model<sup>24</sup> and supported by scientific evidence<sup>33</sup>. Education is considered the best practice  
36 for changing people's risk perceptions. Social marketing campaigns targeting youth at risk of  
37 DUIC or RWCD may also be effective in heightening risk perceptions and decreasing the  
38 prevalence of both behaviours. Allocating a share of Canada's cannabis tax revenues to fund  
39 public education and social marketing campaigns highlighting the risks of driving after cannabis  
40 use may be a cost-effective strategy for doing so.  
41  
42  
43  
44  
45  
46  
47

48 This study has limitations. First, data were cross-sectional and therefore a cause-and-  
49 effect relationship between risk perception and cannabis-related driving behaviours cannot be  
50 made. Second, cannabis-related driving behaviours were self-reported and may reflect under and  
51 over-reporting. Next, our risk perception measure focused on cannabis use rather than DUIC and  
52 RWCD risk perception. As well, potential confounders including risk-engaging personality,  
53  
54  
55  
56  
57  
58  
59  
60



1  
2  
3 sexual orientation, and depression were not available for analysis. Lastly, due to the school-based  
4 nature of our study, the results may not be generalizable to home-schooled and absentee students  
5 (including truant students). Despite these limitations, this study has important strengths including  
6 the survey's national scope, high response rate, large sample size, and provincially generalizable  
7 estimates.  
8  
9

10  
11  
12 This study indicates perceptions of risk matter for young people: greater perceived risk of  
13 cannabis was associated with reduced risk of cannabis-related driving and passenger behaviour  
14 in a robust and dose-response manner. These associations were consistent for both sexes, and for  
15 urban and rural students. Given these associations, efforts are required to disseminate appropriate  
16 information regarding cannabis-related driving risks to high school students. Heightening risk  
17 perceptions of students who feel that regular cannabis use poses no risk at all is also warranted.  
18 To achieve this, a multi-pronged approach akin to what has led to substantial reductions in  
19 drinking and driving is needed – a combination of robust public health policy and regulation,  
20 education, social marketing, and effective enforcement approaches<sup>34,35</sup>.  
21  
22  
23  
24  
25  
26  
27  
28  
29  
30  
31  
32  
33  
34  
35  
36  
37  
38  
39  
40  
41  
42  
43  
44  
45  
46  
47  
48  
49  
50  
51  
52  
53  
54  
55  
56  
57  
58  
59  
60

## References

1. Cerdá M, Wall M, Feng T, Keyes KM, Sarvet A, Schulenberg J, et al. Association of state recreational marijuana laws with adolescent marijuana use. *JAMA Pediatr.* 2017 Feb;171(2):142-149.
2. Couper FJ, Peterson BL. The prevalence of marijuana in suspected impaired driving cases in Washington state. *J Anal Toxicol.* 2014 Oct;38(8):569-574.
3. Statistics Canada. Canadian Tobacco, Alcohol and Drugs Survey (CTADS): summary of results for 2017 [Internet]. Ottawa, ON: Government of Canada; 2019 Jan 4 [cited 2019 Aug 2]. Available from: <https://www.canada.ca/en/health-canada/services/canadian-tobacco-alcohol-drugs-survey/2017-summary.html>
4. Asbridge M, Hayden JA, Cartwright JL. Acute cannabis consumption and motor vehicle collision risk: systematic review of observational studies and meta-analysis. *BMJ.* 2012 Feb;344:e536.
5. Li MC, Brady JE, DiMaggio CJ, Lusardi AR, Tzong KY, Li G. Marijuana use and motor vehicle crashes. *Epidemiol Rev.* 2012 Jan;34(1):65-72.
6. Compton RP, Berning A. Drug and alcohol crash risk [Internet]. Washington, DC: National Highway Traffic Safety Administration; 2015 Feb [cited 2018 Aug 27]. Report No.: DOT HS 812 117. Available from: [https://www.nhtsa.gov/sites/nhtsa.dot.gov/files/812117-drug\\_and\\_alcohol\\_crash\\_risk.pdf](https://www.nhtsa.gov/sites/nhtsa.dot.gov/files/812117-drug_and_alcohol_crash_risk.pdf)
7. Lacey JH, Kelley-Baker T, Berning A, Romano E, Ramirez A, Yao J, et al. Drug and alcohol crash risk: a case-control study [Internet]. Washington, DC: National Highway Traffic Safety Administration; 2016 Dec [cited 2018 Aug 27]. Report No.: DOT HS 812 355. Available from: [https://www.nhtsa.gov/sites/nhtsa.dot.gov/files/documents/812355\\_drugalcoholcrashrisk.pdf](https://www.nhtsa.gov/sites/nhtsa.dot.gov/files/documents/812355_drugalcoholcrashrisk.pdf)
8. Brubacher JR, Chan H, Erdelyi S, Macdonald S, Asbridge M, Mann RE, et al. Cannabis use as a risk factor for causing motor vehicle crashes: a prospective study. *Addiction.* 2019 Sep;114(9):1616-1626.
9. Cimbura G, Lucas DM, Bennett RC, Donelson AC. Incidence and toxicological aspects of cannabis and ethanol detected in 1394 fatally injured drivers and pedestrians in Ontario (1982-1984). *J Forensic Sci.* 1990 Sep;35(5):1035-1041.
10. Stoduto G, Vingilis E, Kapur BM, Sheu WJ, McLellan BA, Liban CB. Alcohol and drug use among motor vehicle collision victims admitted to a regional trauma unit: demographic, injury, and crash characteristics. *Accid Anal Prev.* 1993 Aug;25(4):411-420.

11. Mercer GW, Jeffery WK. Alcohol, drugs, and impairment in fatal traffic accidents in British Columbia. *Accid Anal Prev.* 1995 Jun;27(3):335-343.
12. Woodall KL, Chow BL, Lauwers A, Cass D. Toxicological findings in fatal motor vehicle collisions in Ontario, Canada: a one-year study. *J Forensic Sci.* 2015 May;60(3):669-674.
13. Brubacher JR, Chan H, Martz W, Schreiber W, Asbridge M, Eppler J, et al. Prevalence of alcohol and drug use in injured British Columbia drivers. *BMJ Open.* 2016 Mar;6(3):e009278.
14. Jonah B. CCMTA public opinion survey of drugs and driving in Canada: summary report [Internet]. Ottawa, ON: Canadian Council of Motor Transport Administrators; 2013 Oct 3 [cited 2019 Aug 1]. Available from: [https://ccmta.ca/images/publications/pdf/CCMTA\\_Public\\_Opinion\\_Survey\\_of\\_Drugs\\_and\\_Driving\\_in\\_Canada\\_revised\\_2014\\_04\\_14\\_FINAL\\_ENGLISH.pdf](https://ccmta.ca/images/publications/pdf/CCMTA_Public_Opinion_Survey_of_Drugs_and_Driving_in_Canada_revised_2014_04_14_FINAL_ENGLISH.pdf)
15. Health Canada. Canadian Alcohol and Drug Use Monitoring Survey: summary of results for 2012 [Internet]. Ottawa, ON: Government of Canada; 2014 Apr 8 [cited 2018 Mar 17]. Available from: <https://www.canada.ca/en/health-canada/services/health-concerns/drug-prevention-treatment/drug-alcohol-use-statistics/canadian-alcohol-drug-use-monitoring-survey-summary-results-2012.html>
16. Canadian Centre on Substance Abuse. Cannabis, driving and implications for youth [Internet]. Ottawa, ON: Canadian Centre on Substance Abuse; 2015 [cited 2018 Mar 17]. Available from: <https://www.ccsa.ca/sites/default/files/2019-04/CCSA-Cannabis-Driving-Implications-for-Youth-Summary-2015-en.pdf>
17. Minaker LM, Bonham A, Elton-Marshall T, Leos-Toro C, Wild TC, Hammond D. Under the influence: examination of prevalence and correlates of alcohol and marijuana consumption in relation to youth driving and passenger behaviours in Canada. A cross-sectional study. *CMAJ Open.* 2017 May;5(2):E386-E394.
18. Beirness DJ, Davis CG. Driving under the influence of cannabis: analysis drawn from the 2004 Canadian Addiction Survey [Internet]. Ottawa, ON: Canadian Centre on Substance Abuse; 2006 Dec [cited 2018 Oct 11]. Available from: <https://www.ccsa.ca/sites/default/files/2019-05/ccsa-011481-2006.pdf>
19. Robertson RD, Mainegra Hing M, Pashley CR, Brown SW, Vanlaar WGM. Prevalence and trends of drugged driving in Canada. *Accid Anal Prev.* 2017 Feb;99(Pt A):236-241.
20. Canadian Centre on Substance Use and Addiction. Impaired driving in Canada [Internet]. Ottawa, ON: Canadian Centre on Substance Use and Addiction; 2019 Mar [cited 2019 Aug 4]. Available from: <https://www.ccsa.ca/sites/default/files/2019-04/CCSA-Impaired-Driving-Canada-Summary-2019-en.pdf>

21. McInnis OA, Young MM, Saewyc E, Jahrig J, Adlaf E, Lemaire J, et al. Urban and rural student substance use: technical report [Internet]. Ottawa, ON: Canadian Centre on Substance Abuse; 2015 Sep [cited 2018 Oct 3]. Available from: [https://www.ccsa.ca/sites/default/files/2019-05/CCSA-Urban-Rural-Student-Substance-Use-Report-2015-en\\_0.pdf](https://www.ccsa.ca/sites/default/files/2019-05/CCSA-Urban-Rural-Student-Substance-Use-Report-2015-en_0.pdf)
22. Aitken C, Kerger M, Crofts N. Drivers who use illicit drugs: behaviour and perceived risks. *Drugs: Educ Prev Polic*. 2000 Feb;7(1):39-50.
23. Greene KM. Perceptions of driving after marijuana use compared to alcohol use among rural American young adults. *Drug Alcohol Rev*. 2018 Jul;37(5):637-644.
24. Rosenstock IM. Historical origins of the health belief model. *Health Educ Monogr*. 1974 Dec;2(4):328-335.
25. Slovic P. Perceptions of risk: reflections on the psychometric paradigm. In: Golding D, Krimsky S, editors. *Social theories of risk*. New York: Praeger; c1992. p.1-54.
26. Sjöberg L, Moen BE, Rundmo T. Explaining risk perception. An evaluation of the psychometric paradigm in risk perception research [Internet]. Trondheim, NO: Rotunde; 2004 Sep [cited 2018 Apr 10]. Available from: [http://www.svt.ntnu.no/psy/torbjorn.rundmo/psychometric\\_paradigm.pdf](http://www.svt.ntnu.no/psy/torbjorn.rundmo/psychometric_paradigm.pdf)
27. Wickens CM, Watson TM, Mann RE, Brands B. Exploring perceptions among people who drive after cannabis use: collision risk, comparative optimism and normative influence. *Drug Alcohol Rev*. 2019 May;38(4):443-451.
28. Weinstein ND. Unrealistic optimism about susceptibility to health problems. *J Behav Med*. 1982 Dec;5(4):441-460.
29. McCarthy DM, Lynch AM, Pederson SL. Driving after use of alcohol and marijuana in college students. *Psychol Addict Behav*. 2007 Sep;21(3):425-430.
30. Arterberry BJ, Treloar HR, Smith AE, Martens MP, Pedersen SL, McCarthy DM. Marijuana use, driving, and related cognitions. *Psychol Addict Behav*. 2013 Sep;27(3):854-860.
31. Aston ER, Merrill JE, McCarthy DM, Metrik J. Risk factors for driving after and during marijuana use. *J Stud Alcohol Drugs*. 2016 Mar;77(2):309-316.
32. von Elm E, Altman DG, Egger M, Pocock SJ, Gøtzsche PC, Vandenbroucke JP. The Strengthening of Reporting of Observational Studies in Epidemiology (STROBE) Statement: guidelines for reporting observational studies.

- 1  
2  
3  
4  
5  
6  
7  
8  
9  
10  
11  
12  
13  
14  
15  
16  
17  
18  
19  
20  
21  
22  
23  
24  
25  
26  
27  
28  
29  
30  
31  
32  
33  
34  
35  
36  
37  
38  
39  
40  
41  
42  
43  
44  
45  
46  
47  
48  
49  
50  
51  
52  
53  
54  
55  
56  
57  
58  
59  
60
33. Sheeran P, Harris PR, Epton T. Does heightening risk appraisals change people's intentions and behavior? A meta-analysis of experimental studies. *Psychol Bull.* 2014 Mar;140(2):511-543.
  34. Room R, Babor T, Rehm J. Alcohol and public health. *The Lancet.* 2005 Feb 5-11;365(9458):519-530.
  35. Babor T, Caetano R, Casswell S, Edwards G, Giesbrecht N, Graham K, et al. *Alcohol: no ordinary commodity: research and public policy.* 2nd edition. United States: Oxford University Press; 2010.

Confidential

**Table 1.** Sociodemographic and other characteristics of Canadian grade 9-12 students who participated in the 2016-2017 Canadian Student Tobacco, Alcohol and Drugs Survey ( $n = 33\ 915$ )

| Variables                              | High school students ( $n = 33\ 915$ ) |            |                 |
|----------------------------------------|----------------------------------------|------------|-----------------|
|                                        | <i>n</i>                               | Weighted % | CI <sup>a</sup> |
| Sex                                    |                                        |            |                 |
| Female                                 | 16 938                                 | 48.7       | 0.5             |
| Male                                   | 16 977                                 | 51.3       | 0.5             |
| School grade                           |                                        |            |                 |
| 9                                      | 10 643                                 | 25.4       | 0.5             |
| 10                                     | 8752                                   | 25.4       | 0.5             |
| 11                                     | 8257                                   | 25.2       | 0.5             |
| 12                                     | 6263                                   | 24.0       | 0.5             |
| Rural setting                          |                                        |            |                 |
| No                                     | 25 665                                 | 83.0       | 0.4             |
| Yes                                    | 8250                                   | 17.0       | 0.4             |
| Province                               |                                        |            |                 |
| Ontario                                | 7828                                   | 47.0       | 0.5             |
| Québec                                 | 1943                                   | 15.6       | 0.4             |
| British Columbia                       | 4300                                   | 13.4       | 0.4             |
| Alberta                                | 6440                                   | 11.8       | 0.3             |
| Saskatchewan                           | 1905                                   | 3.4        | 0.2             |
| Manitoba                               | 2244                                   | 4.3        | 0.2             |
| Nova Scotia                            | 2624                                   | 2.7        | 0.2             |
| Prince Edward Island                   | 2778                                   | 0.4        | 0.1             |
| Newfoundland and Labrador              | 3853                                   | 1.4        | 0.1             |
| Sqr. Autonomy score                    |                                        |            |                 |
| High                                   | 5824                                   | 17.9       | 0.4             |
| Moderate                               | 9246                                   | 29.1       | 0.5             |
| Low                                    | 10 170                                 | 30.4       | 0.5             |
| Very low                               | 8675                                   | 22.6       | 0.4             |
| Perceived risk of regular cannabis use |                                        |            |                 |
| No risk                                | 4086                                   | 10.0       | 0.3             |
| Slight risk                            | 4667                                   | 12.9       | 0.4             |
| Moderate risk                          | 7505                                   | 22.5       | 0.4             |
| Great risk                             | 14 581                                 | 46.9       | 0.5             |
| Don't know/Not stated                  | 3076                                   | 7.7        | 0.3             |
| DUIC ( $n = 14\ 520$ )                 |                                        |            |                 |
| No, never                              | 12 480                                 | 88.9       | 0.5             |
| Yes, in the last 30 days               | 907                                    | 4.9        | 0.4             |
| Yes, more than 30 days ago             | 760                                    | 3.9        | 0.3             |
| Missing                                | 373                                    | 2.3        | 0.2             |
| Not applicable                         | 19 395                                 | –          | –               |
| RWCD ( $n = 33\ 915$ )                 |                                        |            |                 |
| No, never                              | 26 443                                 | 80.4       | 0.4             |
| Yes, in the last 30 days               | 3297                                   | 8.5        | 0.3             |
| Yes, more than 30 days ago             | 3376                                   | 8.9        | 0.3             |
| Missing                                | 799                                    | 2.2        | 0.2             |

Notes: Sqr. = square transformation; DUIC = driving under the influence of cannabis; RWCD = riding with a cannabis-impaired driver.

<sup>a</sup>95% Confidence interval.

**Table 2.** Multinomial logistic regression of driving under the influence of cannabis (DUIC) by perceived risk of regular cannabis use, sex, school grade, rural setting, province, and square of autonomy score among Canadian grade 11 and 12 students who participated in the 2016-2017 Canadian Student Tobacco, Alcohol and Drugs Survey ( $n = 14\ 147$ )

| Variables                                     | DUIC ( $n = 14\ 147$ ) |                      | Unadjusted RRR (95% CI)    |                                     | Adjusted RRR <sup>b</sup> (95% CI) |                                     |
|-----------------------------------------------|------------------------|----------------------|----------------------------|-------------------------------------|------------------------------------|-------------------------------------|
|                                               | $n^a$                  | Weighted estimated % | Past 30-day DUIC vs. Never | More than 30-day ago DUIC vs. Never | Past 30-day DUIC vs. Never         | More than 30-day ago DUIC vs. Never |
| <b>Perceived risk of regular cannabis use</b> |                        |                      |                            |                                     |                                    |                                     |
| No risk (referent)                            | 2061                   | 12.1                 | 1.00                       | 1.00                                | 1.00                               | 1.00                                |
| Slight risk                                   | 2430                   | 15.7                 | 0.54 (0.39, 0.75)***       | 0.65 (0.49, 0.85)**                 | 0.56 (0.39, 0.80)**                | 0.67 (0.51, 0.88)**                 |
| Moderate risk                                 | 3458                   | 25.3                 | 0.17 (0.13, 0.22)***       | 0.30 (0.23, 0.39)***                | 0.19 (0.14, 0.27)***               | 0.34 (0.26, 0.44)***                |
| Great risk                                    | 5205                   | 41.4                 | 0.05 (0.03, 0.08)***       | 0.09 (0.06, 0.12)***                | 0.06 (0.04, 0.10)***               | 0.11 (0.08, 0.15)***                |
| Don't know/Not stated                         | 993                    | 5.5                  | N/A                        | N/A                                 | N/A                                | N/A                                 |
| <b>Sex</b>                                    |                        |                      |                            |                                     |                                    |                                     |
| Female (referent)                             | 7126                   | 49.2                 | 1.00                       | 1.00                                | 1.00                               | 1.00                                |
| Male                                          | 7021                   | 50.8                 | 2.17 (1.56, 3.02)***       | 1.80 (1.39, 2.33)***                | 1.74 (1.25, 2.41)***               | 1.50 (1.17, 1.93)***                |
| <b>School grade</b>                           |                        |                      |                            |                                     |                                    |                                     |
| 11 (referent)                                 | 8043                   | 51.2                 | 1.00                       | 1.00                                | 1.00                               | 1.00                                |
| 12                                            | 6104                   | 48.8                 | 1.91 (1.48, 2.47)***       | 1.86 (1.44, 2.39)***                | 1.91 (1.51, 2.42)***               | 1.83 (1.42, 2.36)***                |
| <b>Rural setting</b>                          |                        |                      |                            |                                     |                                    |                                     |
| No (referent)                                 | 10 516                 | 82.6                 | 1.00                       | 1.00                                | 1.00                               | 1.00                                |
| Yes                                           | 3631                   | 17.4                 | 2.17 (1.59, 2.95)***       | 1.72 (1.12, 2.65)*                  | 1.70 (1.30, 2.24)***               | 1.24 (0.90, 1.71)                   |
| <b>Province</b>                               |                        |                      |                            |                                     |                                    |                                     |
| Ontario (referent)                            | 3475                   | 51.7                 | 1.00                       | 1.00                                | 1.00                               | 1.00                                |
| Québec                                        | 670                    | 9.8                  | 0.66 (0.34, 1.30)          | 0.72 (0.37, 1.40)                   | 1.59 (0.81, 3.13)                  | 1.50 (0.78, 2.89)                   |
| British Columbia                              | 1882                   | 14.0                 | 1.36 (0.78, 2.37)          | 1.58 (0.86, 2.89)                   | 1.25 (0.72, 2.17)                  | 1.51 (0.81, 2.84)                   |
| Alberta                                       | 2533                   | 12.0                 | 1.70 (1.12, 2.57)*         | 2.16 (1.32, 3.53)**                 | 1.37 (0.99, 1.91)                  | 1.90 (1.23, 2.95)**                 |
| Saskatchewan                                  | 788                    | 3.5                  | 3.08 (1.94, 4.88)***       | 3.55 (2.19, 5.74)***                | 2.10 (1.34, 3.29)***               | 2.91 (1.82, 4.67)***                |
| Manitoba                                      | 962                    | 4.5                  | 1.47 (0.94, 2.31)          | 2.32 (1.41, 3.81)***                | 1.04 (0.74, 1.47)                  | 1.88 (1.20, 2.96)**                 |
| Nova Scotia                                   | 1033                   | 2.7                  | 3.39 (2.41, 4.77)***       | 3.61 (2.32, 5.60)***                | 2.59 (1.88, 3.58)***               | 2.89 (1.90, 4.39)***                |
| Prince Edward Island                          | 1103                   | 0.4                  | 2.13 (1.29, 3.51)**        | 2.44 (1.50, 3.97)***                | 1.44 (1.07, 1.93)*                 | 2.02 (1.23, 3.31)**                 |
| Newfoundland and Labrador                     | 1701                   | 1.4                  | 2.28 (1.39, 3.74)***       | 2.67 (1.71, 4.16)***                | 1.82 (1.14, 2.89)*                 | 2.22 (1.45, 3.43)***                |
| <b>Sqr. Autonomy score</b>                    |                        |                      |                            |                                     |                                    |                                     |
| High (referent)                               | 2536                   | 18.4                 | 1.00                       | 1.00                                | 1.00                               | 1.00                                |
| Moderate                                      | 3864                   | 29.0                 | 1.09 (0.75, 1.58)          | 1.15 (0.87, 1.52)                   | 0.99 (0.69, 1.43)                  | 1.05 (0.78, 1.40)                   |
| Low                                           | 3317                   | 23.4                 | 1.05 (0.72, 1.54)          | 1.44 (1.04, 2.01)*                  | 0.87 (0.58, 1.30)                  | 1.21 (0.88, 1.68)                   |
| Very low                                      | 4430                   | 29.2                 | 1.91 (1.27, 2.87)**        | 1.76 (1.30, 2.39)***                | 1.39 (0.90, 2.14)                  | 1.37 (1.02, 1.84)*                  |
| <i>F</i> statistic                            |                        |                      |                            |                                     | $F(36, 464) = 48.13^{***}$         |                                     |

Notes: DUIC = driving under the influence of cannabis; RRR = relative risk ratio; CI = confidence interval; N/A = not applicable; Sqr. = square transformation.

<sup>a</sup> The weighted prevalence estimates are based on 14 147 cases.

<sup>b</sup> Adjusted for perceived risk of regular cannabis use, sex, school grade, rural setting, province, and square of autonomy score.

\*  $p < 0.05$ .

\*\*  $p < 0.01$ .

\*\*\*  $p \leq 0.001$ .

1  
2  
3  
4  
5  
6  
7  
8  
9  
10  
11  
12  
13  
14  
15  
16  
17  
18  
19  
20  
21  
22  
23  
24  
25  
26  
27  
28  
29  
30  
31  
32  
33  
34  
35  
36  
37  
38  
39  
40  
41  
42  
43  
44  
45  
46  
47

**Table 3.** Multinomial logistic regression of riding with a cannabis-impaired driver (RWCD) by perceived risk of regular cannabis use, sex, school grade, rural setting, province, and square of autonomy score among Canadian grade 9-12 students who participated in the 2016-2017 Canadian Student Tobacco, Alcohol and Drugs Survey ( $n = 33\ 116$ )

| Variables                                     | RWCD ( $n = 33\ 116$ ) |                      | Unadjusted RRR (95% CI)    |                                     | Adjusted RRR <sup>b</sup> (95% CI) |                                     |
|-----------------------------------------------|------------------------|----------------------|----------------------------|-------------------------------------|------------------------------------|-------------------------------------|
|                                               | $n^a$                  | Weighted estimated % | Past 30-day RWCD vs. Never | More than 30-day ago RWCD vs. Never | Past 30-day RWCD vs. Never         | More than 30-day ago RWCD vs. Never |
| <b>Perceived risk of regular cannabis use</b> |                        |                      |                            |                                     |                                    |                                     |
| No risk (referent)                            | 4026                   | 10.1                 | 1.00                       | 1.00                                | 1.00                               | 1.00                                |
| Slight risk                                   | 4623                   | 13.0                 | 0.54 (0.45, 0.66)***       | 0.86 (0.72, 1.03)                   | 0.54 (0.45, 0.65)***               | 0.85 (0.71, 1.03)                   |
| Moderate risk                                 | 7442                   | 22.9                 | 0.28 (0.23, 0.33)***       | 0.55 (0.47, 0.65)***                | 0.28 (0.24, 0.33)***               | 0.54 (0.46, 0.64)***                |
| Great risk                                    | 14 453                 | 47.5                 | 0.07 (0.06, 0.09)***       | 0.22 (0.18, 0.26)***                | 0.08 (0.07, 0.10)***               | 0.23 (0.19, 0.28)***                |
| Don't know/Not stated                         | 2572                   | 6.5                  | N/A                        | N/A                                 | N/A                                | N/A                                 |
| <b>Sex</b>                                    |                        |                      |                            |                                     |                                    |                                     |
| Female (referent)                             | 16 668                 | 49.1                 | 1.00                       | 1.00                                | 1.00                               | 1.00                                |
| Male                                          | 16 448                 | 50.9                 | 1.01 (0.87, 1.17)          | 0.87 (0.77, 0.98)*                  | 0.75 (0.65, 0.87)***               | 0.73 (0.63, 0.84)***                |
| <b>School grade</b>                           |                        |                      |                            |                                     |                                    |                                     |
| 9 (referent)                                  | 10 400                 | 25.3                 | 1.00                       | 1.00                                | 1.00                               | 1.00                                |
| 10                                            | 8546                   | 25.4                 | 1.96 (1.62, 2.37)***       | 2.02 (1.70, 2.41)***                | 1.78 (1.46, 2.16)***               | 1.92 (1.60, 2.32)***                |
| 11                                            | 8062                   | 25.2                 | 2.92 (2.30, 3.71)***       | 2.48 (2.10, 2.93)***                | 2.52 (1.99, 3.19)***               | 2.29 (1.94, 2.70)***                |
| 12                                            | 6108                   | 24.1                 | 4.27 (3.28, 5.56)***       | 3.74 (3.10, 4.52)***                | 3.82 (2.93, 4.99)***               | 3.86 (3.17, 4.69)***                |
| <b>Rural setting</b>                          |                        |                      |                            |                                     |                                    |                                     |
| No (referent)                                 | 25 047                 | 83.0                 | 1.00                       | 1.00                                | 1.00                               | 1.00                                |
| Yes                                           | 8069                   | 17.0                 | 1.69 (1.34, 2.13)***       | 1.53 (1.17, 2.00)**                 | 1.43 (1.16, 1.75)***               | 1.26 (1.01, 1.56)*                  |
| <b>Province</b>                               |                        |                      |                            |                                     |                                    |                                     |
| Ontario (referent)                            | 7638                   | 47.0                 | 1.00                       | 1.00                                | 1.00                               | 1.00                                |
| Québec                                        | 1923                   | 15.8                 | 1.05 (0.81, 1.35)          | 1.47 (1.16, 1.86)***                | 2.13 (1.64, 2.78)***               | 2.57 (2.03, 3.26)***                |
| British Columbia                              | 4168                   | 13.3                 | 1.42 (1.00, 2.02)          | 1.36 (0.95, 1.94)                   | 1.34 (0.96, 1.86)                  | 1.36 (0.96, 1.92)                   |
| Alberta                                       | 6315                   | 11.9                 | 1.34 (1.02, 1.77)*         | 1.84 (1.36, 2.50)***                | 1.24 (1.01, 1.53)*                 | 1.82 (1.39, 2.39)***                |
| Saskatchewan                                  | 1866                   | 3.4                  | 1.93 (1.22, 3.05)**        | 2.52 (1.85, 3.42)***                | 1.55 (0.95, 2.54)                  | 2.32 (1.63, 3.31)***                |
| Manitoba                                      | 2192                   | 4.2                  | 1.61 (1.20, 2.17)**        | 1.62 (1.26, 2.08)***                | 1.35 (1.06, 1.72)*                 | 1.53 (1.24, 1.90)***                |
| Nova Scotia                                   | 2570                   | 2.6                  | 3.37 (2.60, 4.36)***       | 3.13 (2.53, 3.88)***                | 2.80 (2.20, 3.55)***               | 2.87 (2.32, 3.56)***                |
| Prince Edward Island                          | 2725                   | 0.4                  | 1.76 (1.32, 2.33)***       | 1.94 (1.57, 2.38)***                | 1.41 (1.14, 1.74)***               | 1.77 (1.39, 2.24)***                |
| Newfoundland and Labrador                     | 3719                   | 1.4                  | 2.13 (1.66, 2.73)***       | 2.00 (1.60, 2.52)***                | 1.79 (1.43, 2.24)***               | 1.85 (1.49, 2.30)***                |
| <b>Sqr. Autonomy score</b>                    |                        |                      |                            |                                     |                                    |                                     |
| High (referent)                               | 5752                   | 18.1                 | 1.00                       | 1.00                                | 1.00                               | 1.00                                |
| Moderate                                      | 9157                   | 29.4                 | 1.10 (0.85, 1.43)          | 1.37 (1.14, 1.65)***                | 1.05 (0.80, 1.38)                  | 1.33 (1.10, 1.61)**                 |
| Low                                           | 10 044                 | 30.8                 | 1.49 (1.18, 1.90)***       | 1.50 (1.23, 1.83)***                | 1.34 (1.05, 1.72)*                 | 1.42 (1.18, 1.72)***                |
| Very low                                      | 8163                   | 21.7                 | 1.83 (1.49, 2.26)***       | 1.78 (1.47, 2.17)***                | 1.45 (1.17, 1.80)***               | 1.61 (1.29, 2.01)***                |
| <b>F statistic</b>                            |                        |                      |                            |                                     | $F(40, 460) = 70.16^{***}$         |                                     |

Notes: RWCD = riding with a cannabis-impaired driver; RRR = relative risk ratio; CI = confidence interval; N/A = not applicable; Sqr. = square transformation.

<sup>a</sup> The weighted prevalence estimates are based on 33 116 cases.

<sup>b</sup> Adjusted for perceived risk of regular cannabis use, sex, school grade, rural setting, province, and square of autonomy score.

\*  $p < 0.05$ .

\*\*  $p < 0.01$ .

\*\*\*  $p \leq 0.001$ .



# Reporting checklist for cross sectional study.

Based on the STROBE cross sectional guidelines.

## Instructions to authors

Complete this checklist by entering the page numbers from your manuscript where readers will find each of the items listed below.

Your article may not currently address all the items on the checklist. Please modify your text to include the missing information. If you are certain that an item does not apply, please write "n/a" and provide a short explanation.

Upload your completed checklist as an extra file when you submit to a journal.

In your methods section, say that you used the STROBE cross sectional reporting guidelines, and cite them as:

von Elm E, Altman DG, Egger M, Pocock SJ, Gøtzsche PC, Vandenbroucke JP. The Strengthening the Reporting of Observational Studies in Epidemiology (STROBE) Statement: guidelines for reporting observational studies.

|                           |                     | Reporting Item                                                                                  | Page Number |
|---------------------------|---------------------|-------------------------------------------------------------------------------------------------|-------------|
| <b>Title and abstract</b> |                     |                                                                                                 |             |
| Title                     | <a href="#">#1a</a> | Indicate the study's design with a commonly used term in the title or the abstract              | 1           |
| Abstract                  | <a href="#">#1b</a> | Provide in the abstract an informative and balanced summary of what was done and what was found | 2           |
| <b>Introduction</b>       |                     |                                                                                                 |             |
| Background / rationale    | <a href="#">#2</a>  | Explain the scientific background and rationale for the investigation being reported            | 3           |
| Objectives                | <a href="#">#3</a>  | State specific objectives, including any prespecified hypotheses                                | 3           |
| <b>Methods</b>            |                     |                                                                                                 |             |
| Study design              | <a href="#">#4</a>  | Present key elements of study design early in the paper                                         | 4           |
| Setting                   | <a href="#">#5</a>  | Describe the setting, locations, and relevant dates, including periods of                       | 4           |

|    |                      |                                                                                                                                                                                                                                                                                                     |         |
|----|----------------------|-----------------------------------------------------------------------------------------------------------------------------------------------------------------------------------------------------------------------------------------------------------------------------------------------------|---------|
|    |                      | recruitment, exposure, follow-up, and data collection                                                                                                                                                                                                                                               |         |
| 1  |                      |                                                                                                                                                                                                                                                                                                     |         |
| 2  |                      |                                                                                                                                                                                                                                                                                                     |         |
| 3  | Eligibility criteria | <a href="#">#6a</a> Give the eligibility criteria, and the sources and methods of selection of participants.                                                                                                                                                                                        | 4       |
| 4  |                      |                                                                                                                                                                                                                                                                                                     |         |
| 5  |                      |                                                                                                                                                                                                                                                                                                     |         |
| 6  |                      | <a href="#">#7</a> Clearly define all outcomes, exposures, predictors, potential confounders, and effect modifiers. Give diagnostic criteria, if applicable                                                                                                                                         | 4, 5, 6 |
| 7  |                      |                                                                                                                                                                                                                                                                                                     |         |
| 8  |                      |                                                                                                                                                                                                                                                                                                     |         |
| 9  |                      |                                                                                                                                                                                                                                                                                                     |         |
| 10 |                      |                                                                                                                                                                                                                                                                                                     |         |
| 11 | Data sources /       | <a href="#">#8</a> For each variable of interest give sources of data and details of methods of assessment (measurement). Describe comparability of assessment methods if there is more than one group. Give information separately for for exposed and unexposed groups if applicable.             | 4, 5    |
| 12 | measurement          |                                                                                                                                                                                                                                                                                                     |         |
| 13 |                      |                                                                                                                                                                                                                                                                                                     |         |
| 14 |                      |                                                                                                                                                                                                                                                                                                     |         |
| 15 |                      |                                                                                                                                                                                                                                                                                                     |         |
| 16 |                      |                                                                                                                                                                                                                                                                                                     |         |
| 17 |                      |                                                                                                                                                                                                                                                                                                     |         |
| 18 | Bias                 | <a href="#">#9</a> Describe any efforts to address potential sources of bias                                                                                                                                                                                                                        | 6       |
| 19 |                      |                                                                                                                                                                                                                                                                                                     |         |
| 20 |                      |                                                                                                                                                                                                                                                                                                     |         |
| 21 | Study size           | <a href="#">#10</a> Explain how the study size was arrived at                                                                                                                                                                                                                                       | 4       |
| 22 |                      |                                                                                                                                                                                                                                                                                                     |         |
| 23 | Quantitative         | <a href="#">#11</a> Explain how quantitative variables were handled in the analyses. If applicable, describe which groupings were chosen, and why                                                                                                                                                   | 4, 5, 6 |
| 24 | variables            |                                                                                                                                                                                                                                                                                                     |         |
| 25 |                      |                                                                                                                                                                                                                                                                                                     |         |
| 26 |                      |                                                                                                                                                                                                                                                                                                     |         |
| 27 | Statistical          | <a href="#">#12a</a> Describe all statistical methods, including those used to control for confounding                                                                                                                                                                                              | 6       |
| 28 | methods              |                                                                                                                                                                                                                                                                                                     |         |
| 29 |                      |                                                                                                                                                                                                                                                                                                     |         |
| 30 |                      |                                                                                                                                                                                                                                                                                                     |         |
| 31 | Statistical          | <a href="#">#12b</a> Describe any methods used to examine subgroups and interactions                                                                                                                                                                                                                | 6       |
| 32 | methods              |                                                                                                                                                                                                                                                                                                     |         |
| 33 |                      |                                                                                                                                                                                                                                                                                                     |         |
| 34 | Statistical          | <a href="#">#12c</a> Explain how missing data were addressed                                                                                                                                                                                                                                        | 6       |
| 35 | methods              |                                                                                                                                                                                                                                                                                                     |         |
| 36 |                      |                                                                                                                                                                                                                                                                                                     |         |
| 37 |                      |                                                                                                                                                                                                                                                                                                     |         |
| 38 | Statistical          | <a href="#">#12d</a> If applicable, describe analytical methods taking account of sampling strategy                                                                                                                                                                                                 | 6       |
| 39 | methods              |                                                                                                                                                                                                                                                                                                     |         |
| 40 |                      |                                                                                                                                                                                                                                                                                                     |         |
| 41 |                      |                                                                                                                                                                                                                                                                                                     |         |
| 42 | Statistical          | <a href="#">#12e</a> Describe any sensitivity analyses                                                                                                                                                                                                                                              | 6       |
| 43 | methods              |                                                                                                                                                                                                                                                                                                     |         |
| 44 |                      |                                                                                                                                                                                                                                                                                                     |         |
| 45 |                      |                                                                                                                                                                                                                                                                                                     |         |
| 46 | <b>Results</b>       |                                                                                                                                                                                                                                                                                                     |         |
| 47 |                      |                                                                                                                                                                                                                                                                                                     |         |
| 48 | Participants         | <a href="#">#13a</a> Report numbers of individuals at each stage of study—eg numbers potentially eligible, examined for eligibility, confirmed eligible, included in the study, completing follow-up, and analysed. Give information separately for for exposed and unexposed groups if applicable. | n/a     |
| 49 |                      |                                                                                                                                                                                                                                                                                                     |         |
| 50 |                      |                                                                                                                                                                                                                                                                                                     |         |
| 51 |                      |                                                                                                                                                                                                                                                                                                     |         |
| 52 |                      |                                                                                                                                                                                                                                                                                                     |         |
| 53 |                      |                                                                                                                                                                                                                                                                                                     |         |
| 54 |                      |                                                                                                                                                                                                                                                                                                     |         |
| 55 |                      |                                                                                                                                                                                                                                                                                                     |         |
| 56 | Participants         | <a href="#">#13b</a> Give reasons for non-participation at each stage                                                                                                                                                                                                                               | n/a     |
| 57 |                      |                                                                                                                                                                                                                                                                                                     |         |
| 58 |                      |                                                                                                                                                                                                                                                                                                     |         |
| 59 |                      |                                                                                                                                                                                                                                                                                                     |         |
| 60 |                      |                                                                                                                                                                                                                                                                                                     |         |

|    |                    |                      |                                                                                                                                                                                                                   |                    |
|----|--------------------|----------------------|-------------------------------------------------------------------------------------------------------------------------------------------------------------------------------------------------------------------|--------------------|
| 1  | Participants       | <a href="#">#13c</a> | Consider use of a flow diagram                                                                                                                                                                                    | n/a                |
| 2  |                    |                      |                                                                                                                                                                                                                   |                    |
| 3  | Descriptive data   | <a href="#">#14a</a> | Give characteristics of study participants (eg demographic, clinical, social) and information on exposures and potential confounders. Give information separately for exposed and unexposed groups if applicable. | 6-7 (Table 1)      |
| 4  |                    |                      |                                                                                                                                                                                                                   |                    |
| 5  |                    |                      |                                                                                                                                                                                                                   |                    |
| 6  |                    |                      |                                                                                                                                                                                                                   |                    |
| 7  |                    |                      |                                                                                                                                                                                                                   |                    |
| 8  |                    |                      |                                                                                                                                                                                                                   |                    |
| 9  |                    |                      |                                                                                                                                                                                                                   |                    |
| 10 | Descriptive data   | <a href="#">#14b</a> | Indicate number of participants with missing data for each variable of interest                                                                                                                                   | Table 1            |
| 11 |                    |                      |                                                                                                                                                                                                                   |                    |
| 12 |                    |                      |                                                                                                                                                                                                                   |                    |
| 13 |                    |                      |                                                                                                                                                                                                                   |                    |
| 14 | Outcome data       | <a href="#">#15</a>  | Report numbers of outcome events or summary measures. Give information separately for exposed and unexposed groups if applicable.                                                                                 | Table 1            |
| 15 |                    |                      |                                                                                                                                                                                                                   |                    |
| 16 |                    |                      |                                                                                                                                                                                                                   |                    |
| 17 |                    |                      |                                                                                                                                                                                                                   |                    |
| 18 |                    |                      |                                                                                                                                                                                                                   |                    |
| 19 | Main results       | <a href="#">#16a</a> | Give unadjusted estimates and, if applicable, confounder-adjusted estimates and their precision (eg, 95% confidence interval). Make clear which confounders were adjusted for and why they were included          | 7 & Table 1        |
| 20 |                    |                      |                                                                                                                                                                                                                   |                    |
| 21 |                    |                      |                                                                                                                                                                                                                   |                    |
| 22 |                    |                      |                                                                                                                                                                                                                   |                    |
| 23 |                    |                      |                                                                                                                                                                                                                   |                    |
| 24 | Main results       | <a href="#">#16b</a> | Report category boundaries when continuous variables were categorized                                                                                                                                             | Top of 6 & Table 1 |
| 25 |                    |                      |                                                                                                                                                                                                                   |                    |
| 26 |                    |                      |                                                                                                                                                                                                                   |                    |
| 27 |                    |                      |                                                                                                                                                                                                                   |                    |
| 28 | Main results       | <a href="#">#16c</a> | If relevant, consider translating estimates of relative risk into absolute risk for a meaningful time period                                                                                                      | n/a                |
| 29 |                    |                      |                                                                                                                                                                                                                   |                    |
| 30 |                    |                      |                                                                                                                                                                                                                   |                    |
| 31 |                    |                      |                                                                                                                                                                                                                   |                    |
| 32 | Other analyses     | <a href="#">#17</a>  | Report other analyses done—e.g., analyses of subgroups and interactions, and sensitivity analyses                                                                                                                 | 7                  |
| 33 |                    |                      |                                                                                                                                                                                                                   |                    |
| 34 |                    |                      |                                                                                                                                                                                                                   |                    |
| 35 |                    |                      |                                                                                                                                                                                                                   |                    |
| 36 | <b>Discussion</b>  |                      |                                                                                                                                                                                                                   |                    |
| 37 |                    |                      |                                                                                                                                                                                                                   |                    |
| 38 | Key results        | <a href="#">#18</a>  | Summarise key results with reference to study objectives                                                                                                                                                          | 8                  |
| 39 |                    |                      |                                                                                                                                                                                                                   |                    |
| 40 |                    |                      |                                                                                                                                                                                                                   |                    |
| 41 | Limitations        | <a href="#">#19</a>  | Discuss limitations of the study, taking into account sources of potential bias or imprecision. Discuss both direction and magnitude of any potential bias.                                                       | 8-9                |
| 42 |                    |                      |                                                                                                                                                                                                                   |                    |
| 43 |                    |                      |                                                                                                                                                                                                                   |                    |
| 44 |                    |                      |                                                                                                                                                                                                                   |                    |
| 45 |                    |                      |                                                                                                                                                                                                                   |                    |
| 46 | Interpretation     | <a href="#">#20</a>  | Give a cautious overall interpretation considering objectives, limitations, multiplicity of analyses, results from similar studies, and other relevant evidence.                                                  | 8-9                |
| 47 |                    |                      |                                                                                                                                                                                                                   |                    |
| 48 |                    |                      |                                                                                                                                                                                                                   |                    |
| 49 |                    |                      |                                                                                                                                                                                                                   |                    |
| 50 |                    |                      |                                                                                                                                                                                                                   |                    |
| 51 | Generalisability   | <a href="#">#21</a>  | Discuss the generalisability (external validity) of the study results                                                                                                                                             | 9                  |
| 52 |                    |                      |                                                                                                                                                                                                                   |                    |
| 53 |                    |                      |                                                                                                                                                                                                                   |                    |
| 54 | <b>Other</b>       |                      |                                                                                                                                                                                                                   |                    |
| 55 | <b>Information</b> |                      |                                                                                                                                                                                                                   |                    |
| 56 |                    |                      |                                                                                                                                                                                                                   |                    |
| 57 | Funding            | <a href="#">#22</a>  | Give the source of funding and the role of the funders for the present                                                                                                                                            | 1                  |
| 58 |                    |                      |                                                                                                                                                                                                                   |                    |
| 59 |                    |                      |                                                                                                                                                                                                                   |                    |
| 60 |                    |                      |                                                                                                                                                                                                                   |                    |

1 study and, if applicable, for the original study on which the present  
2 article is based  
3

4 Notes:  
5

- 6 • 14a: 6-7 (Table 1)  
7
- 8 • 16a: 7 & Table 1  
9
- 10 • 16b: Top of 6 & Table 1 The STROBE checklist is distributed under the terms of the Creative Commons  
11 Attribution License CC-BY. This checklist was completed on 11. March 2020 using  
12 <https://www.goodreports.org/>, a tool made by the [EQUATOR Network](#) in collaboration with [Penelope.ai](#)  
13  
14  
15  
16  
17  
18  
19  
20  
21  
22  
23  
24  
25  
26  
27  
28  
29  
30  
31  
32  
33  
34  
35  
36  
37  
38  
39  
40  
41  
42  
43  
44  
45  
46  
47  
48  
49  
50  
51  
52  
53  
54  
55  
56  
57  
58  
59  
60

Confidential
